# Supplementary material for: Human Bone Marrow-Derived Mesenchymal Stromal Cells Differentially Inhibit Cytokine Production by Peripheral Blood Monocytes Subpopulations and Myeloid Dendritic Cells
Source: Stem Cells Int. 2015 Apr 28;2015:819084. doi: 10.1155/2015/819084 (PMC4427776; doi:10.1155/2015/819084)
Supplement: Supplementary file 1 — Material and methods for the transwell assays and for the analysis of the growth kinetics, morphology and differentiation of MSC after stimulation with LPS, IFNγ and LPS plus IFNγ. [file 819084.f1.pdf]

## **Supplementary methods**

### **Analysis of the growth kinetics, morphology and differentiation of MSC after stimulation with LPS, IFN $\gamma$ and LPS+IFN $\gamma$**

MSCs were stimulated using LPS (100 ng/ml) from *Escherichia coli* (serotype 055:B5-Sigma), IFN $\gamma$  (100 U/ml) and LPS+IFN $\gamma$  (100 ng/ml and 100 U/ml, respectively), for 6 hours at 37°C in humidified atmosphere containing 5% CO<sub>2</sub>.

For the analysis of the growth kinetics, after incubation with the activating agents, cells were washed twice using in DMEM supplemented with 10% FBS and seeded at 6000 cells/cm<sup>2</sup>. After 3 days in culture, cells were passed and re-seeded in a new culture flask. Cultures were passed every 7 days. The number of population doublings (PDs) was calculated according to  $PDs = \log[(\text{number of harvested cells})/(\text{number of plated cells})]/\log(2)$ .

The morphological analysis was performed after the first passage post stimuli. Cells were seeded into a 24-well plate at a density of 3000 cells/cm<sup>2</sup> for each tested condition. Cells were incubated overnight to allow adherence to the plate and washed with PBS (Gibco), fixed with 4% PFA (Sigma) solution for 30 minutes. Cell membranes were permeabilized with a saponin/PBS solution (50 µg/ml) for 45 minutes followed by incubation with Phalloidin-TRITC solution (1 µl/ml) during 60 minutes. Cells were then labeled with a solution of 1.5 µl/ml of DAPI for 5 minutes. Finally, the cells were observed under an inverted fluorescence microscope (LEICA DMI 3000B, Wetzlar, Germany) and at least 3 images per well were captured with a 100x magnification. The images were subsequently treated using the software ImageJ 1.46 Image Processing and Analysis.

MSC multilineage differentiation assays were performed in MSC stimulated with LPS+IFN $\gamma$ , as described in previous work [Santos 2011], using StemPro Osteogenesis/Adipogenesis/ Chondrogenesis Differentiation Kits (Life Technologies).

### **Transwell assays**

Peripheral blood MNC (10<sup>6</sup> cells) were placed in the upper chamber of the transwell system with 500 µl of RPMI 1640 with GlutaMax medium (Invitrogen) with antibiotic-antimycotic (Gibco), or MSC (0.5x10<sup>6</sup> cells), establishing a ratio of 2:1 (MNC:MSC), in the lower chamber. After an incubation period of 20 hours, at 37 °C, in a sterile environment with 5% CO<sub>2</sub> humidified atmosphere, the cells in the culture were

stimulated with LPS (100 ng/ml), IFN $\gamma$  (100 U/ml), or LPS+IFN $\gamma$  (100 ng/ml and 100 U/ml, respectively), added to the upper chamber, as follows: 1) MNC cultivated in the absence of MSC (20h), stimulation with LPS+IFN $\gamma$  (6h); 2) MNC+MSC co-culture (20h); 3) MNC+MSC co-culture (20h), MNC were removed from the transwell system and stimulated with LPS+IFN $\gamma$  (6h); 4) MNC+MSC co-culture (20h), LPS stimulation (6h); 5) MNC+MSC co-culture (20h), LPS+IFN $\gamma$  stimulation (6h); 6) MNC+MSC co-culture with IFN $\gamma$  stimulation (20h); 7) MNC+MSC co-culture with IFN $\gamma$  stimulation (20h), MNC were removed from the transwell system and stimulated with LPS+IFN $\gamma$  (6h). The incubation with the stimulator agents was made in the previously described conditions. The expression of TNF- $\alpha$  and MIP-1 $\beta$  in monocytes and mDC under these culture conditions was assessed by flow cytometry.

**References:**

1. dos Santos F, Andrade PZ, Boura JS, Abecasis MM, da Silva CL, Cabral JM (2010) Ex vivo expansion of human mesenchymal stem cells: a more effective cell proliferation kinetics and metabolism under hypoxia. J Cell Physiol 223(1): 27-35.
